# Supplementary material for: Sensing of linear alkylammonium ions by a 5-pyrenoylamido-calix[5]arene solution and monolayer using luminescence measurements
Source: Royal Society of Chemistry journal article supplement (doi:10.1039/c1jm13475b), 2011-11-08
Supplement: c1jm13475b.pdf [file c1jm13475b.pdf]

## Electronic Supplementary Information

# Sensing of Linear Alkylammonium Ions by a 5-Pyrenoylamido-Calix[5]arene Solution and Monolayer Using Luminescence Measurements

5

**Domenico A. Cristaldi,<sup>a,b</sup> Ignazio Fragalà,<sup>a,b</sup> Andrea Pappalardo,<sup>a\*</sup> Rosa M. Toscano,<sup>a</sup> Francesco P. Ballistreri,<sup>a</sup> Gaetano A. Tomaselli,<sup>a</sup> and Antonino Gulino<sup>a,b\*</sup>**

10

*<sup>a</sup>Dipartimento di Scienze Chimiche, Università di Catania and <sup>a</sup>I.N.S.T.M. UdR di Catania*

*Viale Andrea Doria 6, 95125 Catania, Italy.*

15

20

25

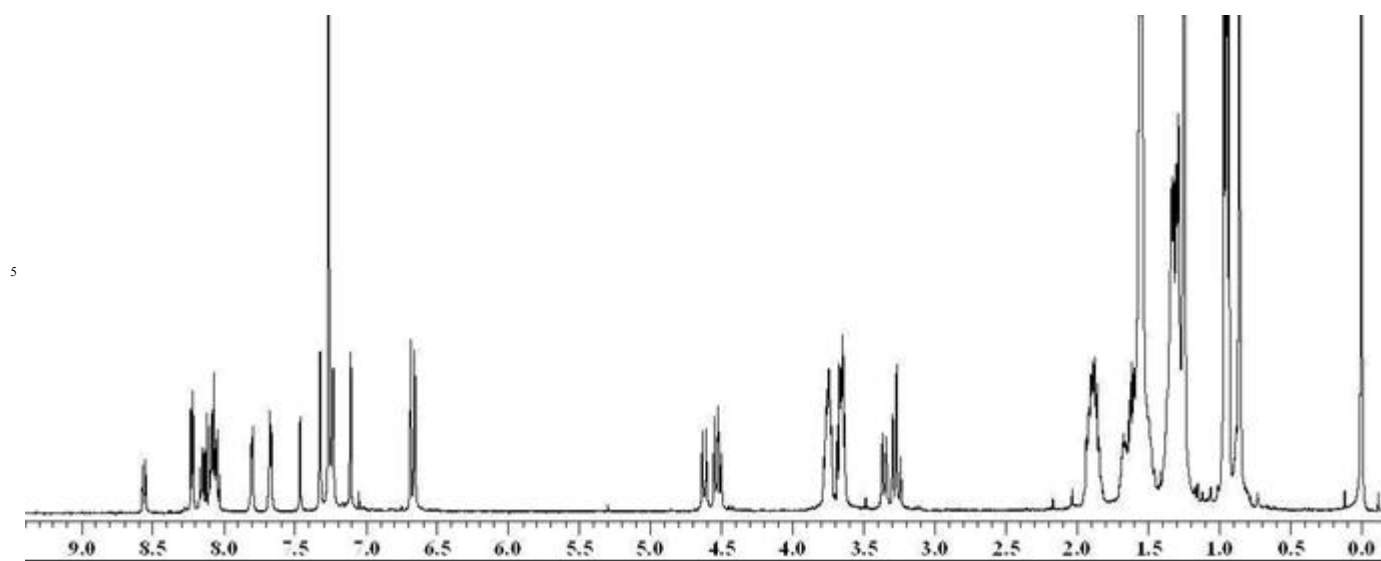

**Figure S1.**  $^1\text{H}$  NMR spectrum of the compound **2** in  $\text{CDCl}_3$ .

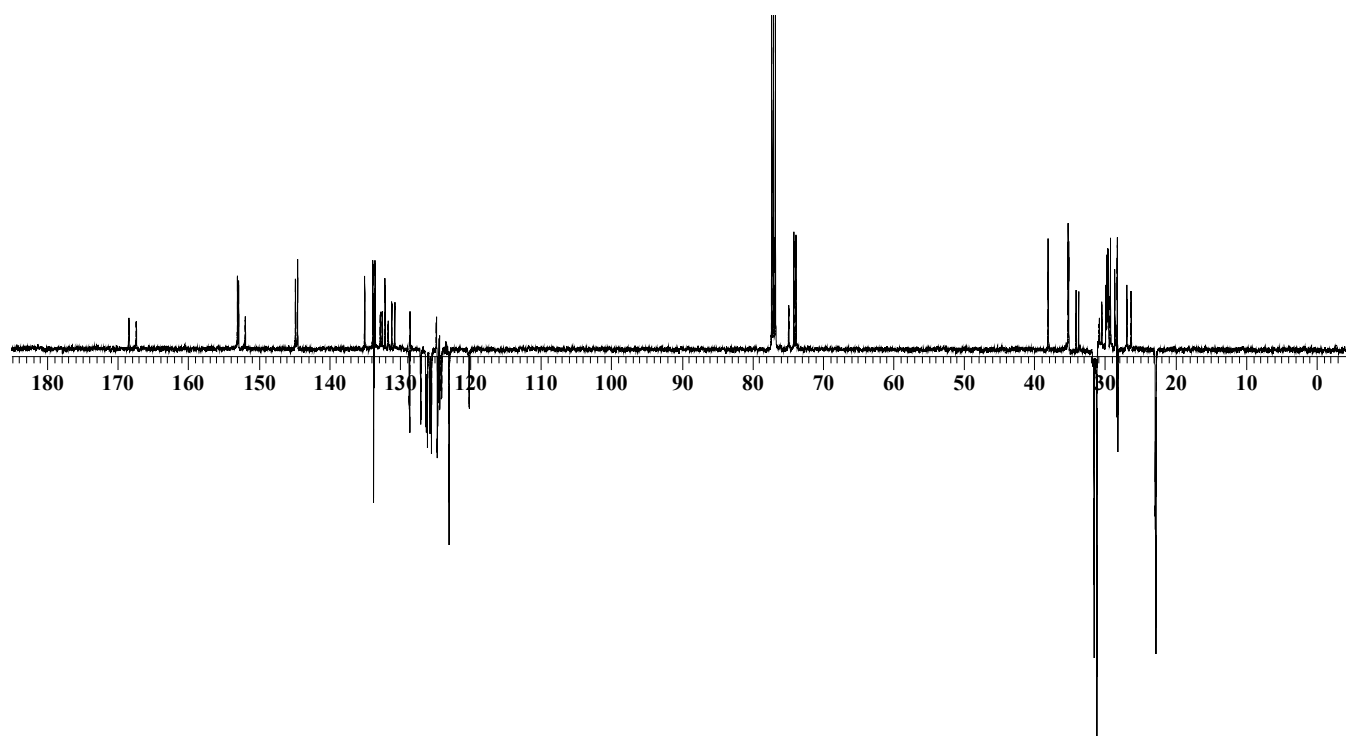

**Figure S2.** APT spectrum of the compound **2** in  $\text{CDCl}_3$ .

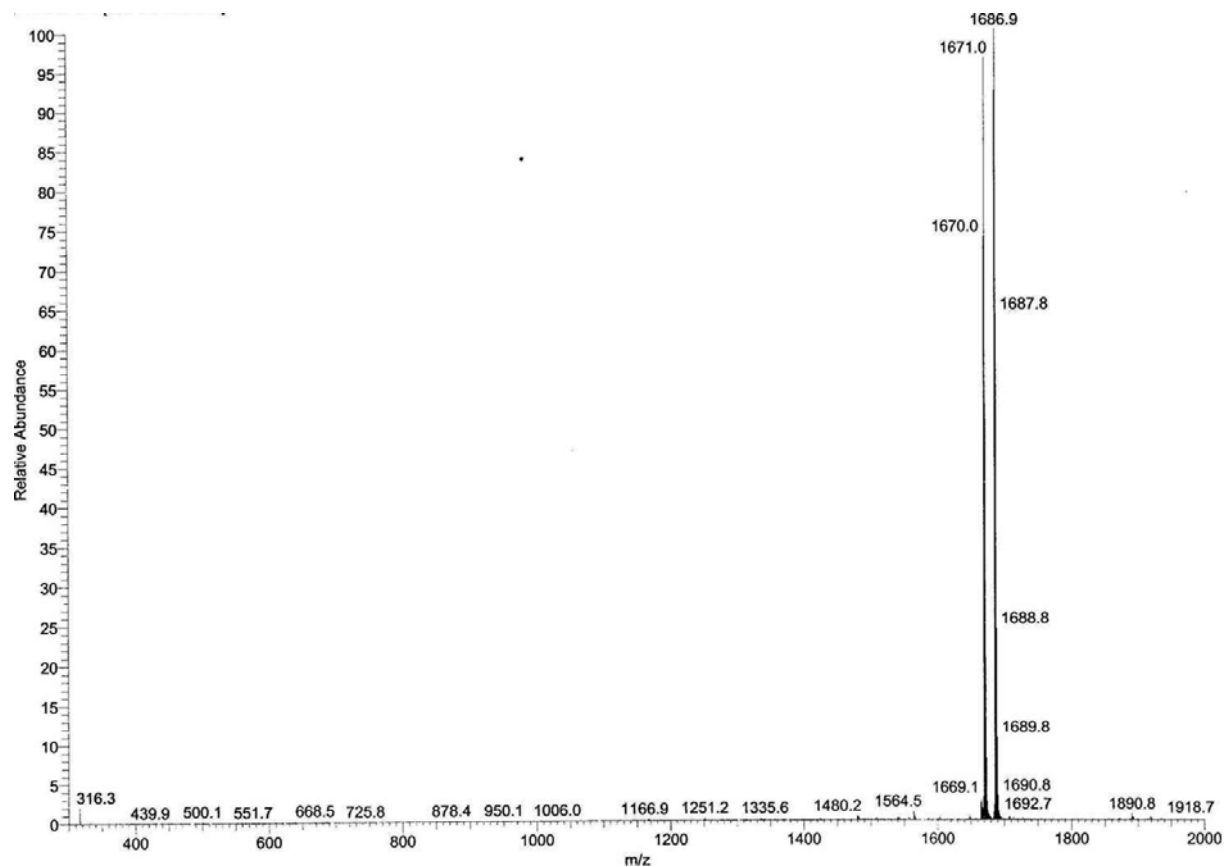

**Figure S3.** ESI-MS of the compound **2**.

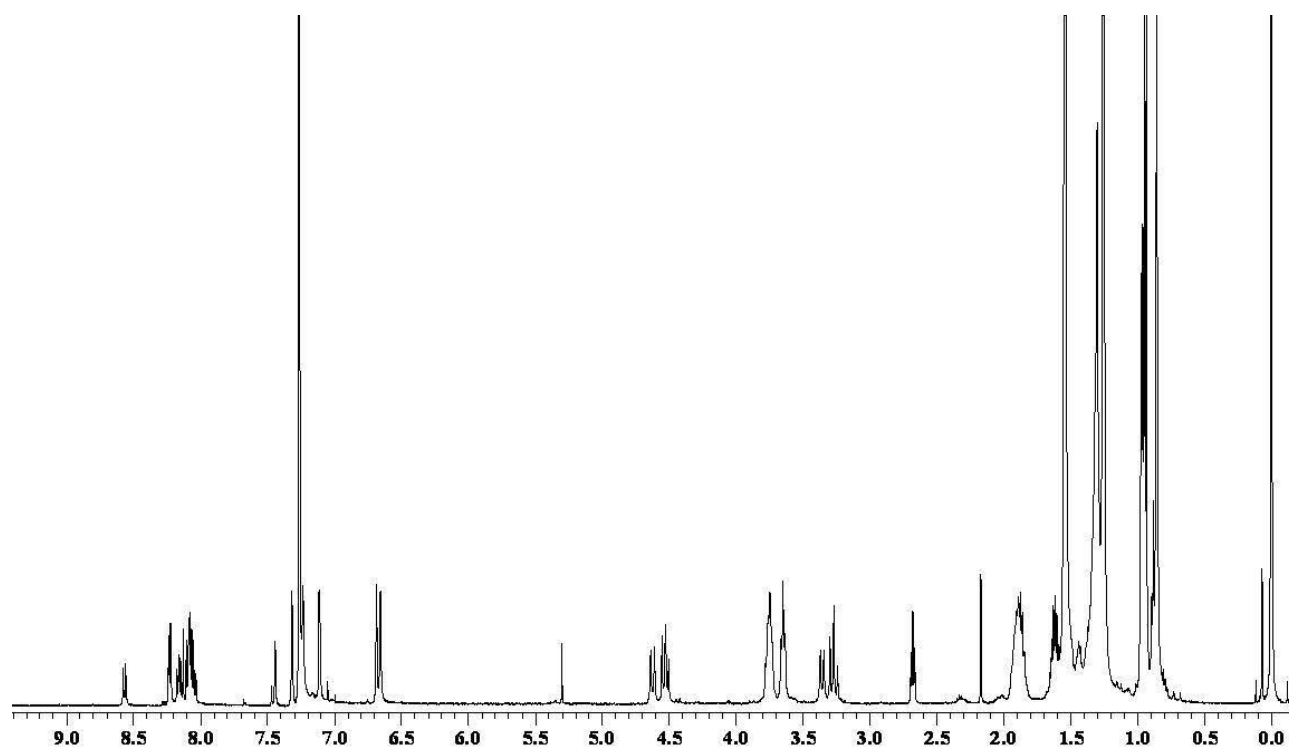

**Figure S4.**  $^1\text{H}$  NMR spectrum of **PyC5-NH<sub>2</sub>** in  $\text{CDCl}_3$ .

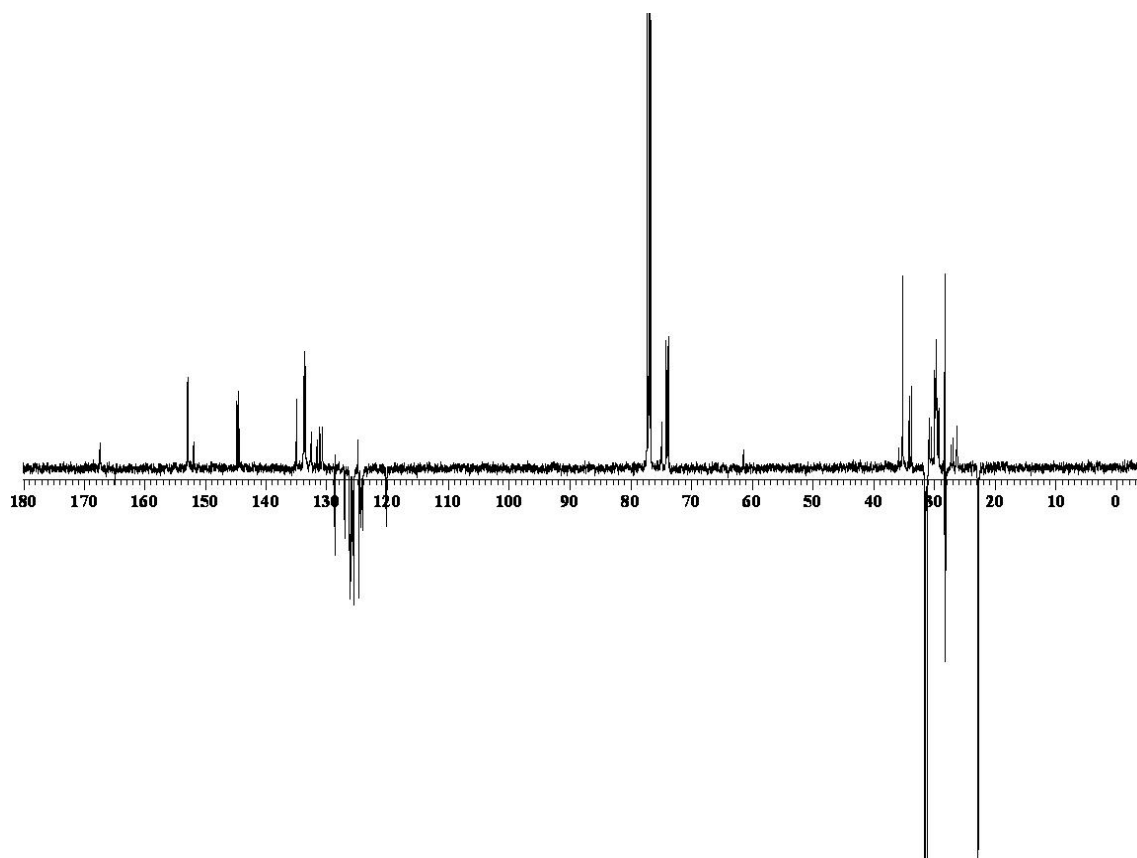

**Figure S5.** APT spectrum of **PyC5-NH<sub>2</sub>** in CDCl<sub>3</sub>.

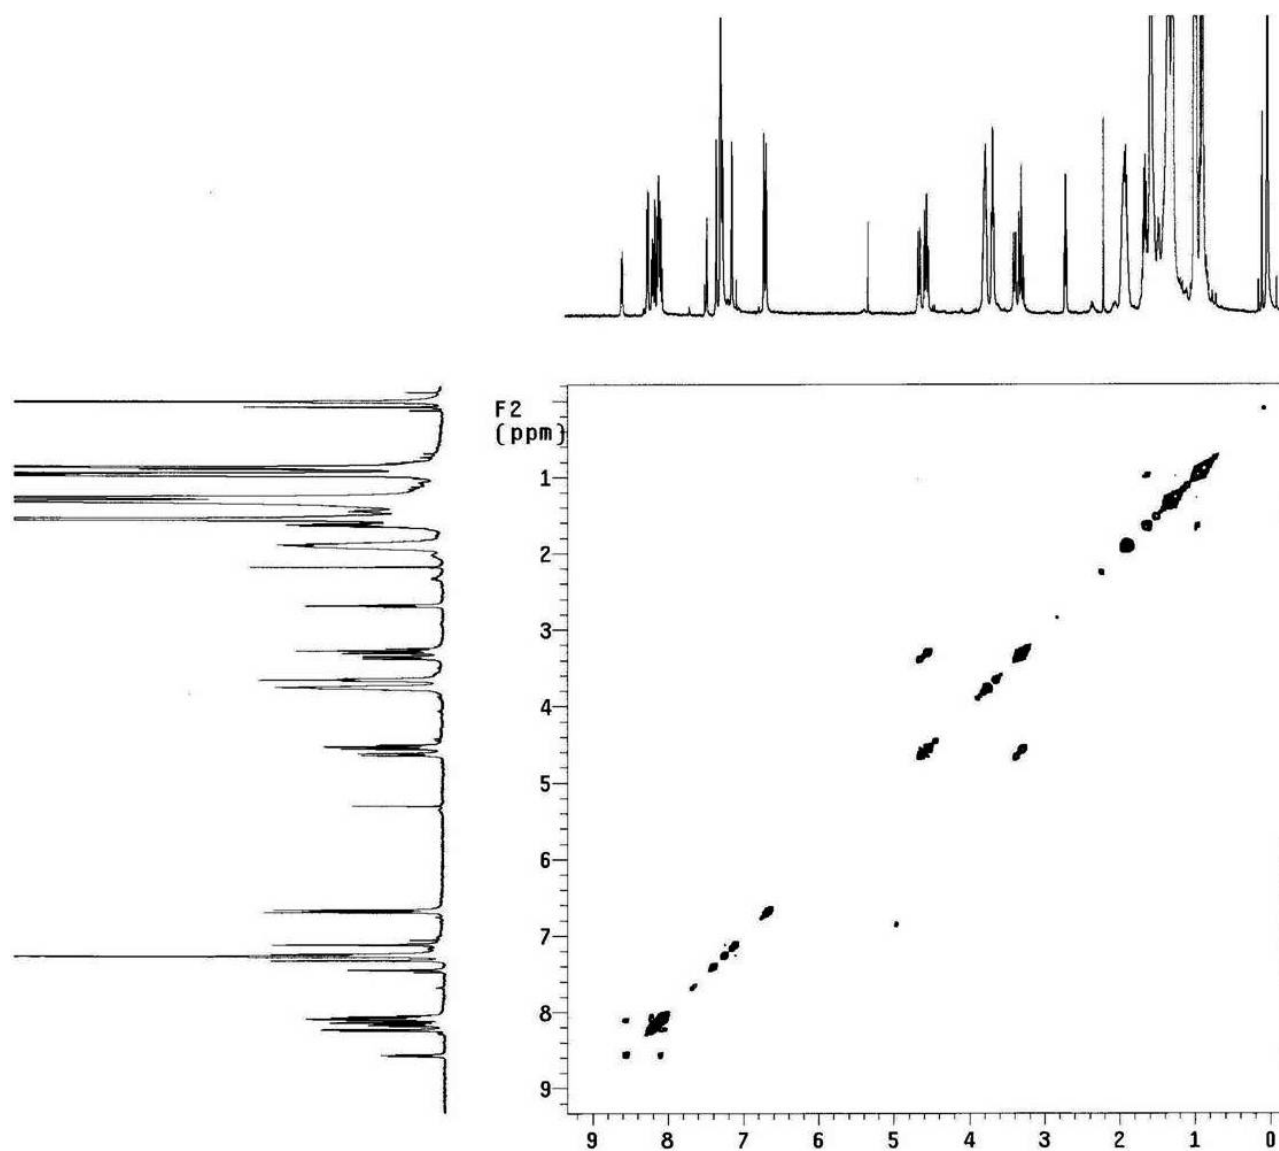

**Figure S6.** 2D-gCOSY spectrum of **PyC5-NH<sub>2</sub>** in CDCl<sub>3</sub>.

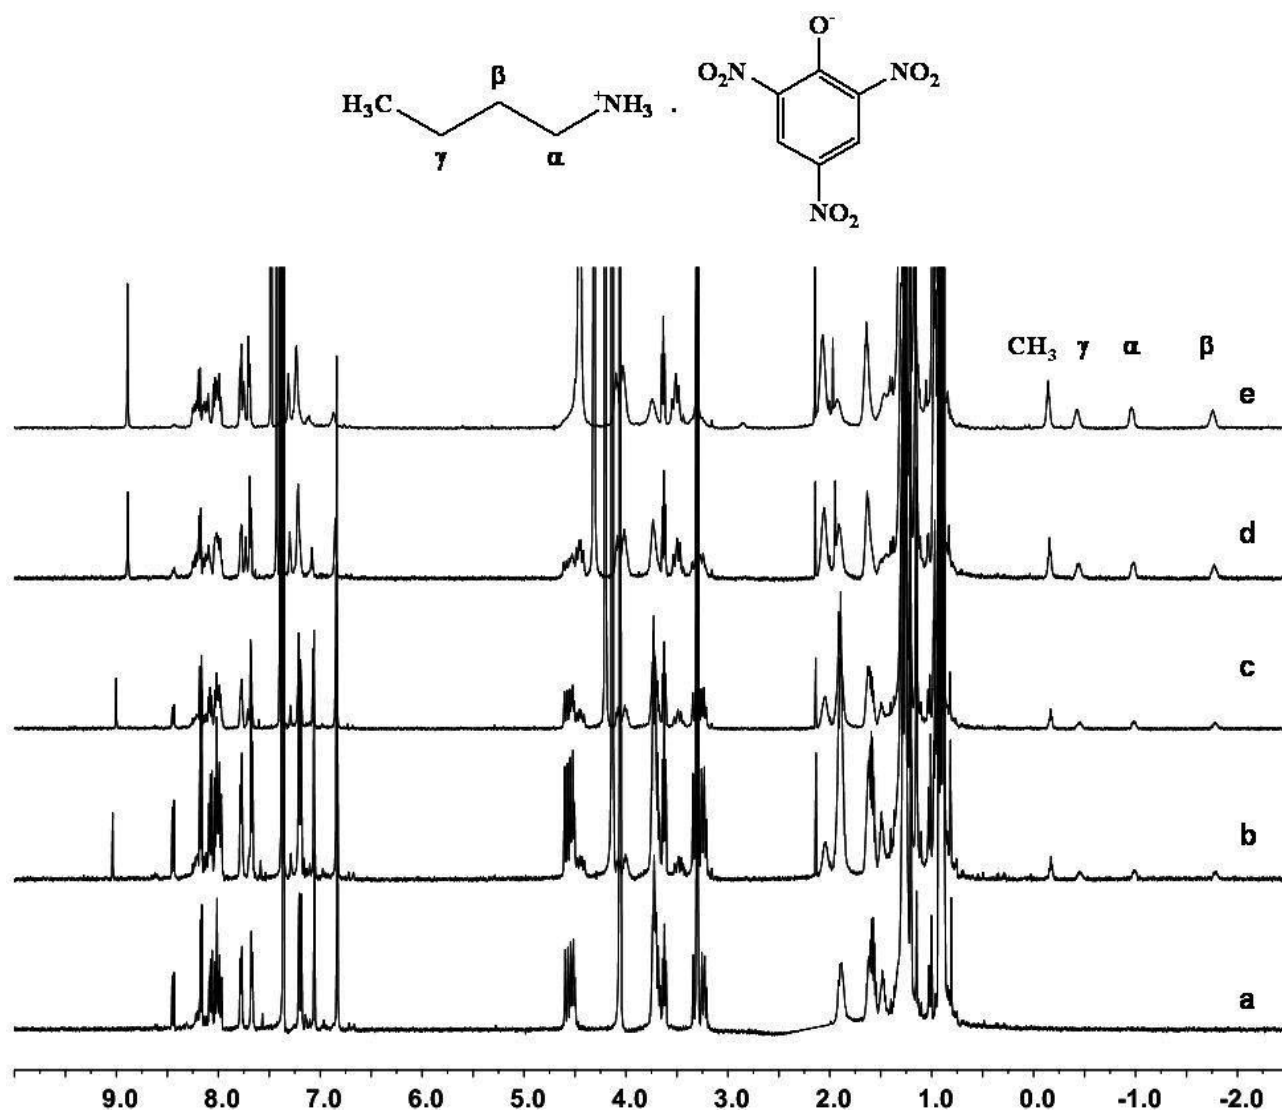

**Figure S7.**  $^1\text{H}$  NMR titration of *n*-Bu·HPic with compound **3**. Constant concentration of host **3** ( $2.00 \times 10^{-3}$  M) with addition of various concentrations ( $0$ – $4.00 \times 10^{-3}$  M) of guest *n*-Bu·HPic.  
 a) compound **3**; b) [H]/[G] 4:1; c) [H]/[G] 2:1; d) [H]/[G] 1:1; e) [H]/[G] 1:2. Signals for the free *n*-Bu·HPic guest are absent in the expected 0.8–3 ppm range. In contrast, they appear in the 0–2 ppm range, thus confirming the endo-complexation of the guest. In addition, an evident intensity increase of these signals parallels the increasing in the guest concentration.

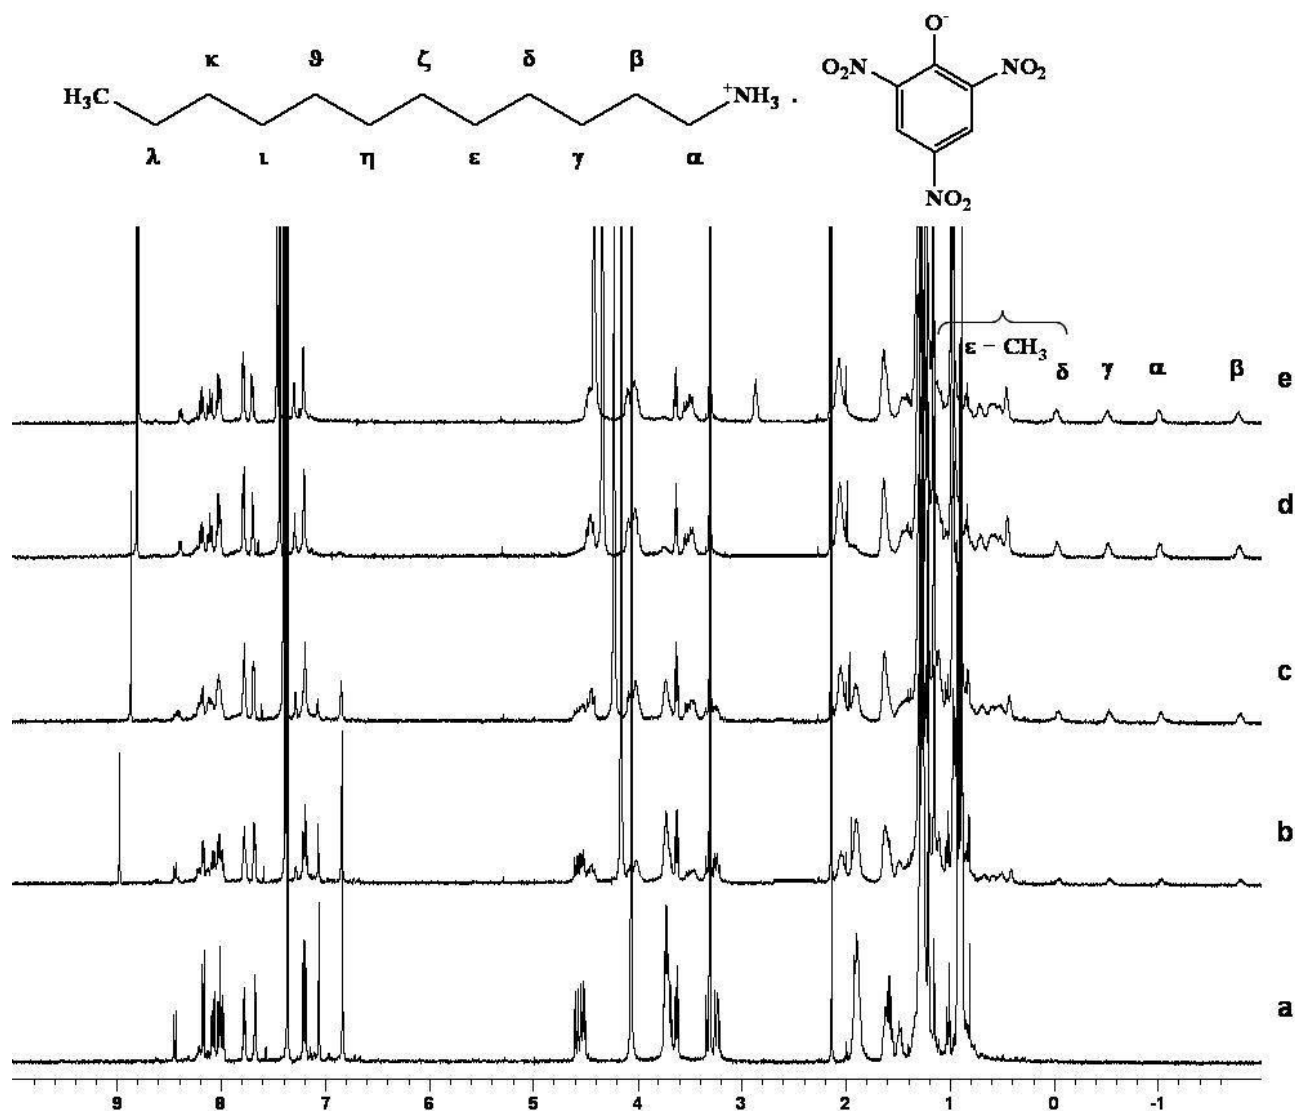

**Figure S8.**  $^1\text{H}$  NMR titration of  $n\text{-C}_{12}\text{NH}_2\cdot\text{HPic}$  with compound **3**. Constant concentration of host **3** ( $2.00\times 10^{-3}$  M) with addition of various concentrations ( $0\text{--}4.00\times 10^{-3}$  M) of guest  $n\text{-C}_{12}\text{NH}_2\cdot\text{HPic}$ .

a) compound **3**; b)  $[\text{H}]/[\text{G}]$  4:1; c)  $[\text{H}]/[\text{G}]$  2:1; d)  $[\text{H}]/[\text{G}]$  1:1; e)  $[\text{H}]/[\text{G}]$  1:2. Signals for the free  $n\text{-C}_{12}\text{NH}_2\cdot\text{HPic}$  guest are absent in the expected 0.8-3 ppm range. In contrast, they appear in the 0-2 ppm range, thus confirming the endo-complexation of the guest. In addition, an evident intensity increase of these signals parallels the increasing in the guest concentration.

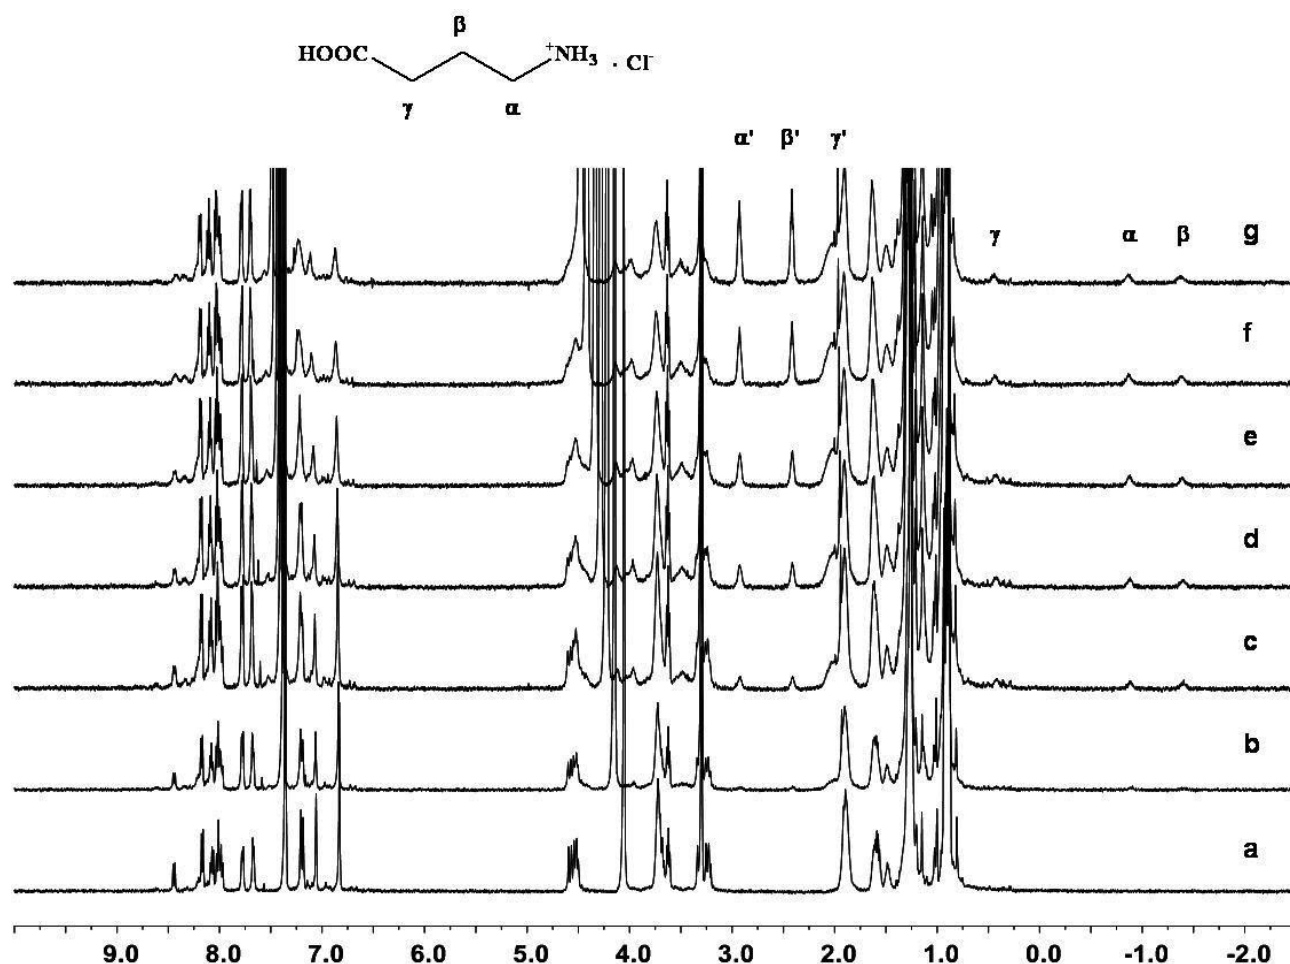

**Figure S9.**  $^1\text{H}$  NMR titration of **GABA·HCl** with compound **3**. Constant concentration of host **3** ( $2.00 \times 10^{-3}$  M) with addition of various concentrations ( $0$ – $4.00 \times 10^{-3}$  M) of guest **GABA·HCl**.  
 a) compound **3**; b)  $[\text{H}]/[\text{G}]$  4:1; c)  $[\text{H}]/[\text{G}]$  2:1; d)  $[\text{H}]/[\text{G}]$  1:0.75; e)  $[\text{H}]/[\text{G}]$  1:1; f)  $[\text{H}]/[\text{G}]$  1:1.5; g)  $[\text{H}]/[\text{G}]$  1:2. Signals for the free **GABA·HCl** guest are present in the expected 2.0–3.0 ppm range ( $\alpha'$   $\beta'$   $\gamma'$ ). In addition, signals of the complexed guest appear in the 0.5– -1.5 ( $\alpha$ ,  $\beta$ ,  $\gamma$ ) ppm range, thus confirming partial endo-complexation of this guest.

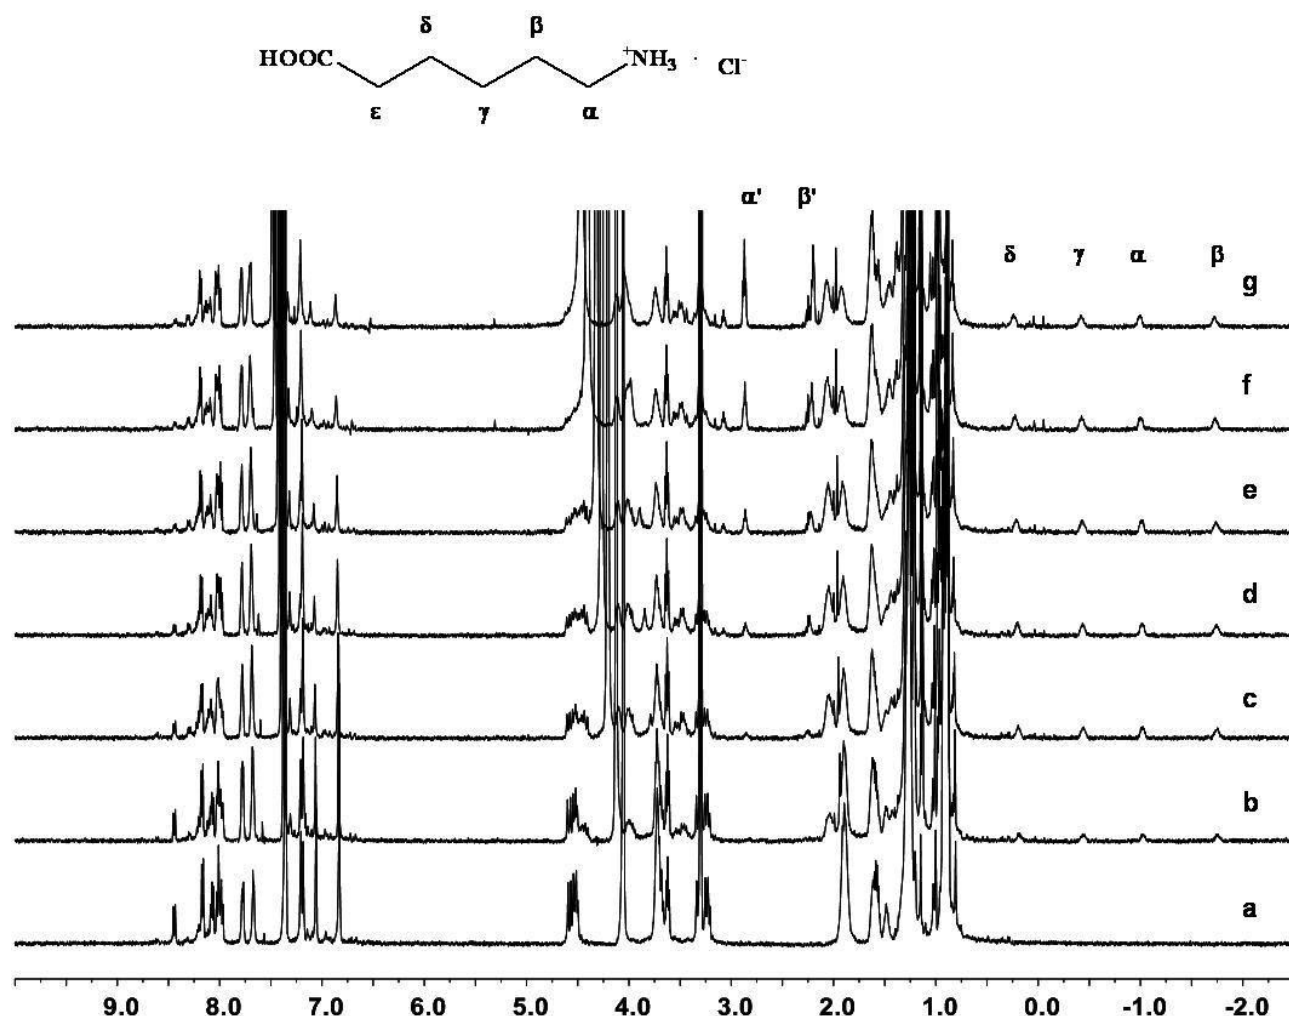

**Figure S10.**  $^1\text{H}$  NMR titration of  $\epsilon\text{-Ahx}\cdot\text{HCl}$  with compound **3**. Constant concentration of host **3** ( $2.00\times 10^{-3}$  M) with addition of various concentrations ( $0\text{--}4.00\times 10^{-3}$  M) of guest  $\epsilon\text{-Ahx}\cdot\text{HCl}$ .  
a) compound **3**; b)  $[\text{H}]/[\text{G}]$  4:1; c)  $[\text{H}]/[\text{G}]$  2:1; d)  $[\text{H}]/[\text{G}]$  1:0.75; e)  $[\text{H}]/[\text{G}]$  1:1; f)  $[\text{H}]/[\text{G}]$  1:1.5; g)  $[\text{H}]/[\text{G}]$  1:2. Signals for the free  $\epsilon\text{-Ahx}\cdot\text{HCl}$  guest are present in the expected 1.0–3.0 ppm range ( $\alpha'$ ,  $\beta'$ ,  $\gamma'$ ,  $\delta'$ ,  $\epsilon'$ ). In addition, signals of the complexed guest appear in the 1.0 – -2.0 ( $\alpha$ ,  $\beta$ ,  $\gamma$ ,  $\delta$ ,  $\epsilon$ ) ppm range, thus confirming partial endo-complexation of this guest.

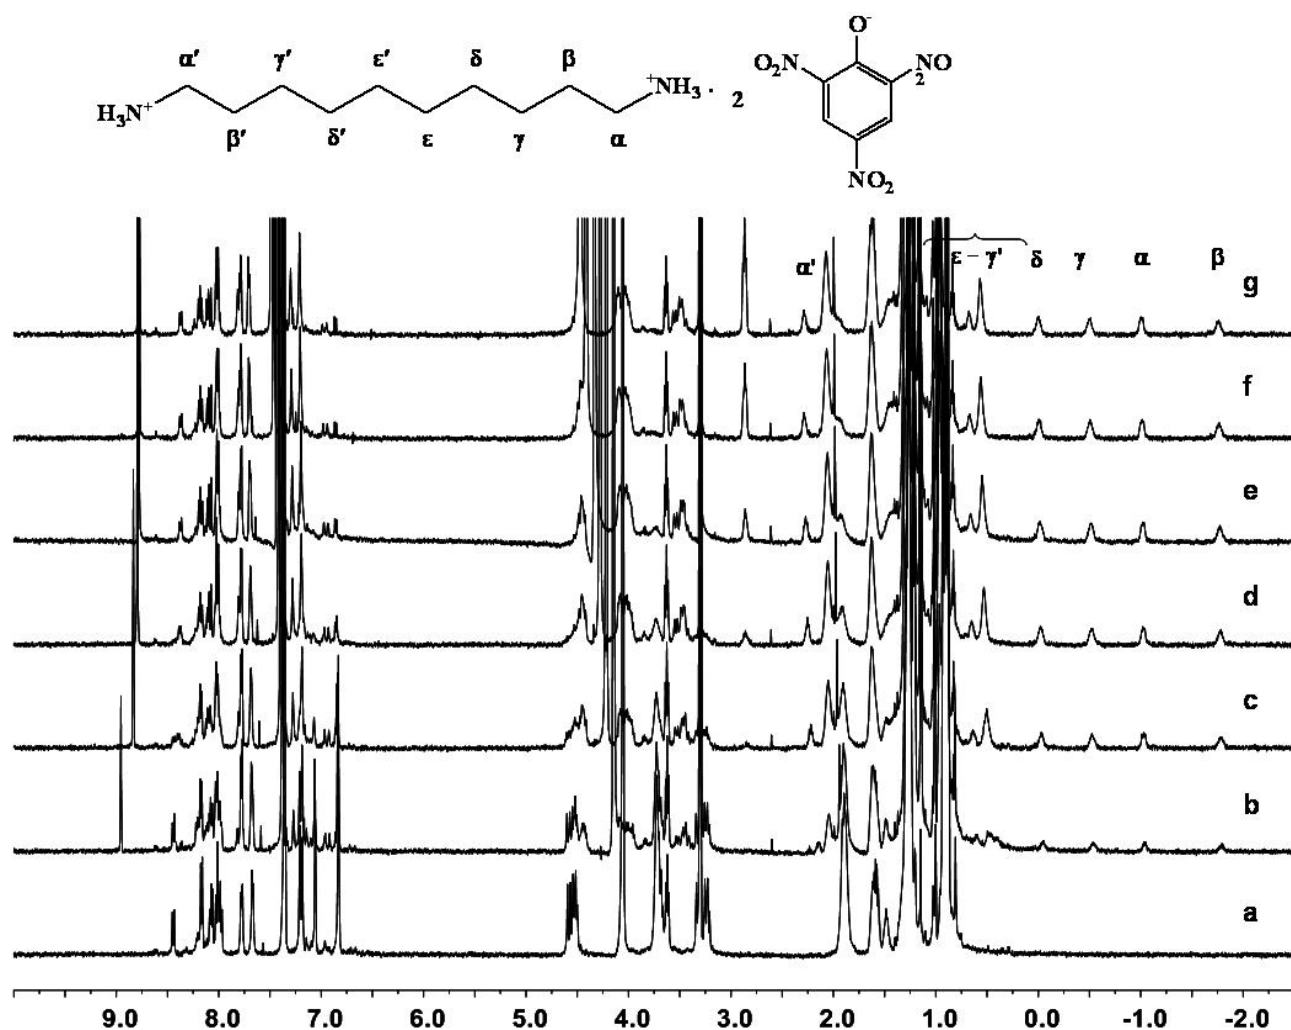

**Figure S11.**  $^1\text{H}$  NMR titration of  $\text{C}_{10}\cdot 2\text{NH}_2\cdot \text{HPic}$  with compound **3**. Constant concentration of host **3** ( $2.00\times 10^{-3}$  M) with addition of various concentrations ( $0\text{--}4.00\times 10^{-3}$  M) of guest  $\text{C}_{10}\cdot 2\text{NH}_2\cdot \text{HPic}$ .  
a) compound **3**; b)  $[\text{H}]/[\text{G}]$  4:1; c)  $[\text{H}]/[\text{G}]$  2:1; d)  $[\text{H}]/[\text{G}]$  1:0.75; e)  $[\text{H}]/[\text{G}]$  1:1; f)  $[\text{H}]/[\text{G}]$  1:1.5; g)  $[\text{H}]/[\text{G}]$  1:2. Titration experiments of **2** with  $\text{C}_{10}\cdot 2\text{NH}_2$ , give rise to changes in the  $^1\text{H}$  NMR spectra that are consistent with the formation of a single complexed species, corresponding to the 1:1 host–guest complex, at any  $[\text{H}]/[\text{G}]$  ratios. This conclusion is validated by the appearing in the spectra of a triplet centered at  $\delta=2.25$  ppm for  $\text{C}_{10}\cdot 2\text{NH}_2$ , since the addition of the first aliquot of the guest salt.  
This triplet is assigned to the  $\alpha'$ - $\text{CH}_2$  protons of the guest and judged of diagnostic value for the formation of the 1:1 host–guest complex.

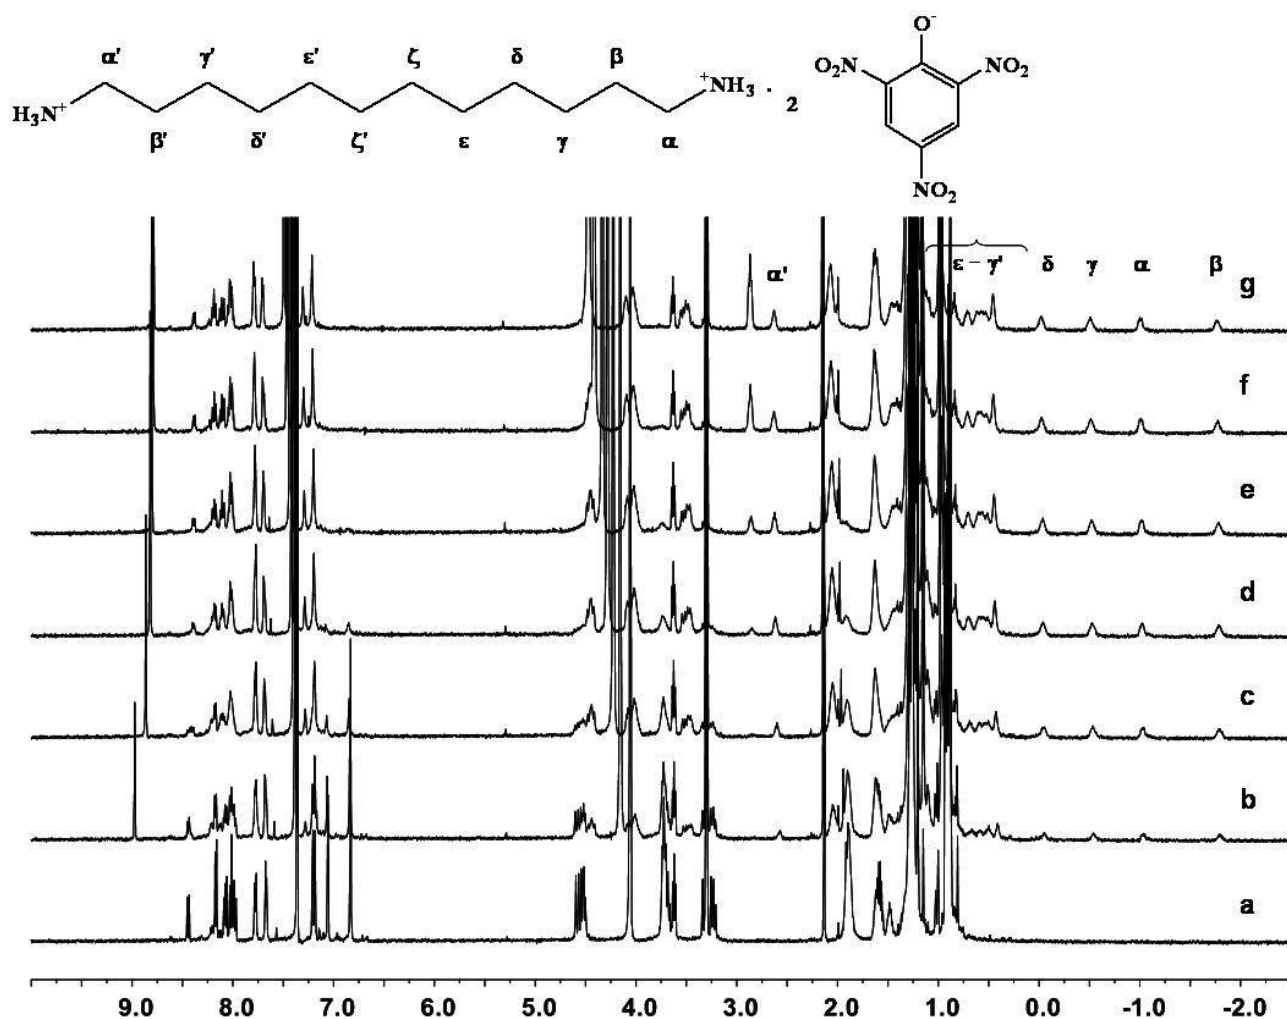

**Figure S12.**  $^1\text{H}$  NMR titration of  $\text{C}_{12}\cdot 2\text{NH}_2\cdot \text{HPic}$  with compound **3**. Constant concentration of host **3** ( $2.00\times 10^{-3}$  M) with addition of various concentrations ( $0\text{--}4.00\times 10^{-3}$  M) of guest  $\text{C}_{12}\cdot 2\text{NH}_2\cdot \text{HPic}$ .

a) compound **3**; b)  $[\text{H}]/[\text{G}]$  4:1; c)  $[\text{H}]/[\text{G}]$  2:1; d)  $[\text{H}]/[\text{G}]$  1:0.75; e)  $[\text{H}]/[\text{G}]$  1:1; f)  $[\text{H}]/[\text{G}]$  1:1.5; g)  $[\text{H}]/[\text{G}]$  1:2. Titration experiments of **2** with  $\text{C}_{12}\cdot 2\text{NH}_2$ , give rise to changes in the  $^1\text{H}$  NMR spectra that are consistent with the formation of a single complexed species, corresponding to the 1:1 host–guest complex, at any  $[\text{H}]/[\text{G}]$  ratios. This conclusion is validated by the appearing in the spectra of a triplet centered at  $\delta=2.63$  ppm for  $\text{C}_{12}\cdot 2\text{NH}_2$ , since the addition of the first aliquot of the guest salt. This triplet is assigned to the  $\alpha'$ - $\text{CH}_2$  protons of the guest and judged of diagnostic value for the formation of the 1:1 host–guest complex.

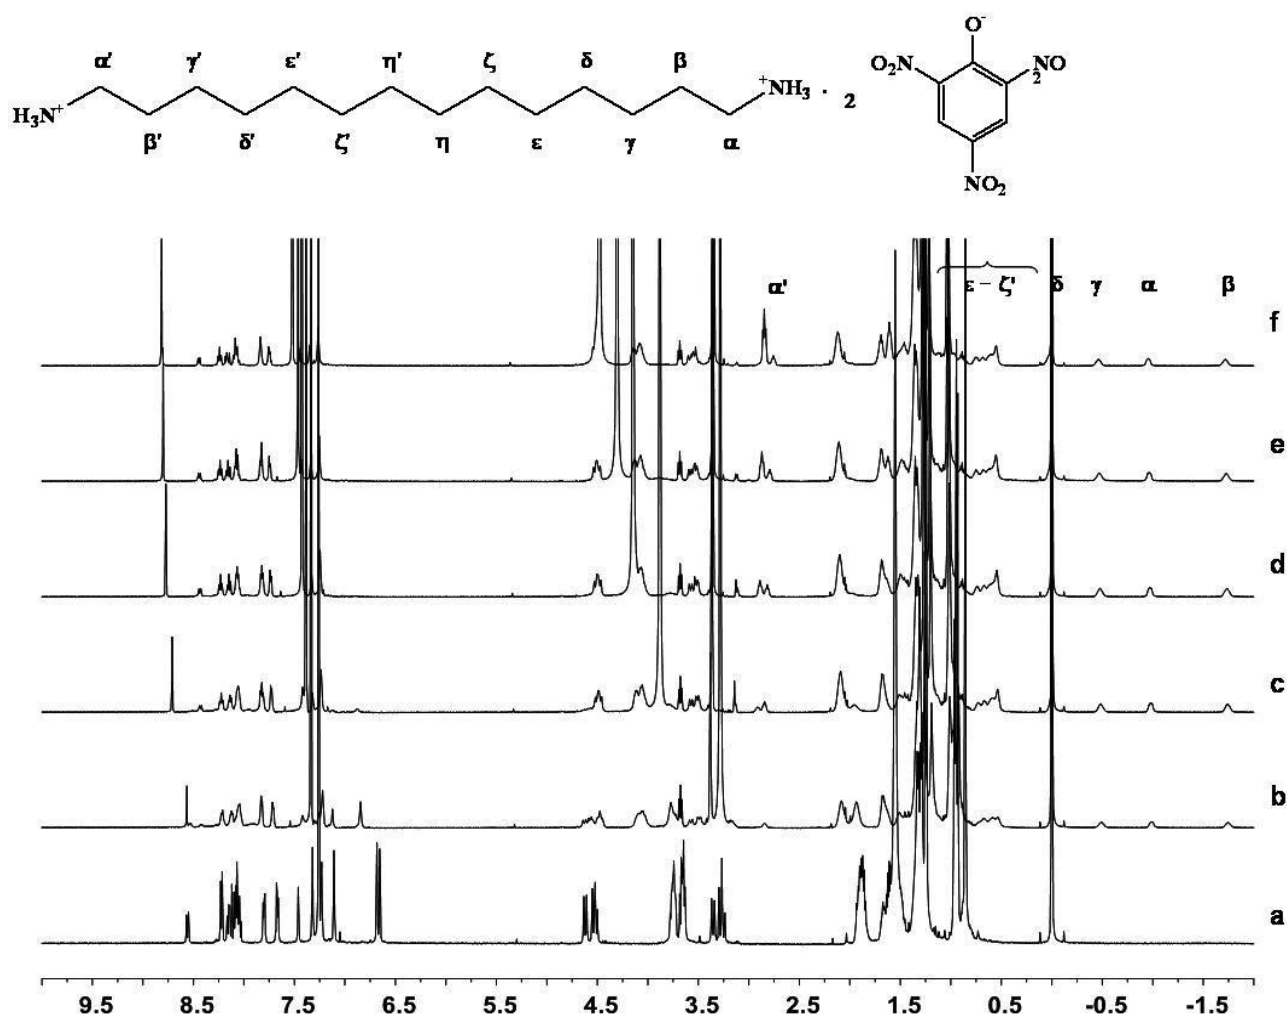

**Figure S13.**  $^1\text{H}$  NMR titration of  $\text{C}_{14}\cdot 2\text{NH}_2\cdot \text{HPic}$  with compound **3**. Constant concentration of host **3** ( $2.00\times 10^{-3}\text{ M}$ ) with addition of various concentrations ( $0\text{--}4.00\times 10^{-3}\text{ M}$ ) of guest  $\text{C}_{14}\cdot 2\text{NH}_2\cdot \text{HPic}$ .  
a) compound **3**; b)  $[\text{H}]/[\text{G}]$  4:1; c)  $[\text{H}]/[\text{G}]$  2:1; d)  $[\text{H}]/[\text{G}]$  1:0.75; e)  $[\text{H}]/[\text{G}]$  1:1; f)  $[\text{H}]/[\text{G}]$  1:2. Titration experiments of **2** with  $\text{C}_{14}\cdot 2\text{NH}_2$ , give rise to changes in the  $^1\text{H}$  NMR spectra that are consistent with the formation of a single complexed species, corresponding to the 1:1 host–guest complex, at any  $[\text{H}]/[\text{G}]$  ratios. This conclusion is validated by the appearing in the spectra of a triplet centered at  $\delta=2.75\text{ ppm}$  for  $\text{C}_{14}\cdot 2\text{NH}_2$ , since the addition of the first aliquot of the guest salt. This triplet is assigned to the  $\alpha'$ - $\text{CH}_2$  protons of the guest and judged of diagnostic value for the formation of the 1:1 host–guest complex.

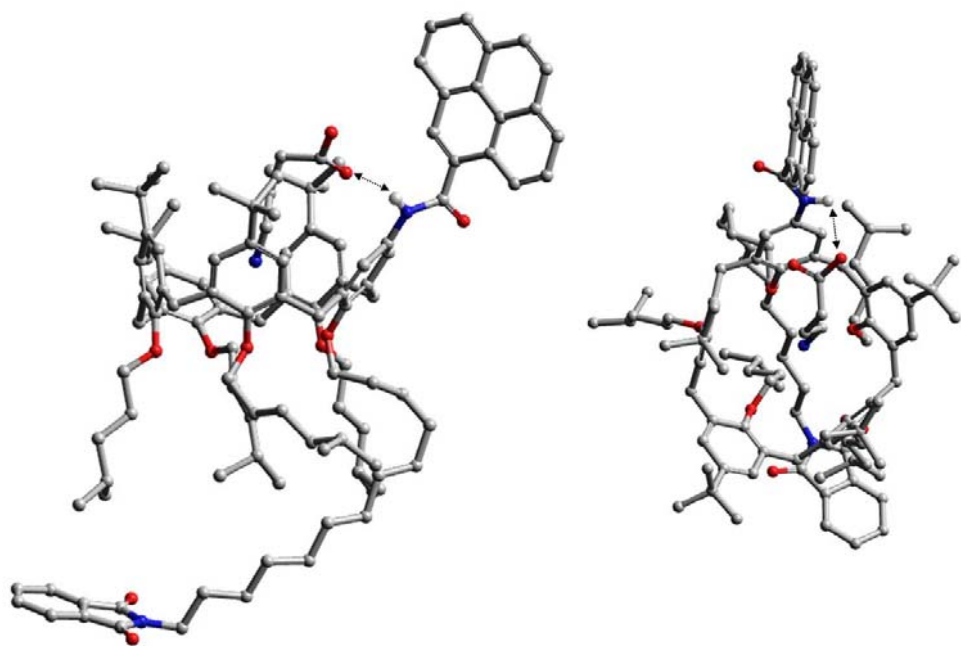

**Figure S14.** Optimized structures of the 1:1 complexes of **3** with **GABA**. Side view (left) and top view (right). (Hydrogens omitted for clarity).

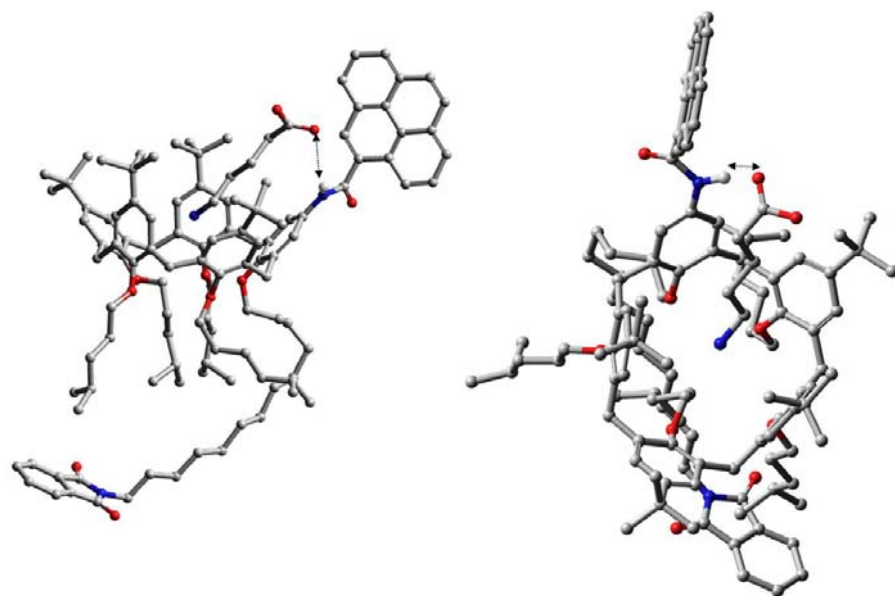

**Figure S15.** Optimized structures of the 1:1 complexes of **3** with **ε-Ahx**. Side view (left) and top view (right). (Hydrogens omitted for clarity).

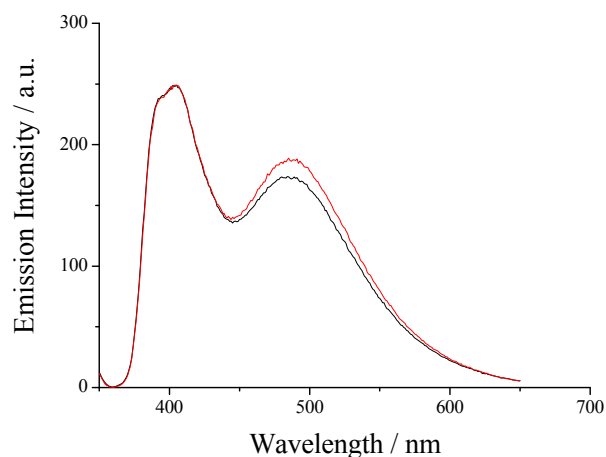

**Figure S16.** Fluorescence spectra of the **PyC5-NH<sub>2</sub>**  $1.0 \times 10^{-5}$  M  $\text{CHCl}_3/\text{CH}_3\text{OH}$  (50:50 v:v) solution (lower intensity) and upon addition of a stoichiometric amount of HCl (higher intensity).

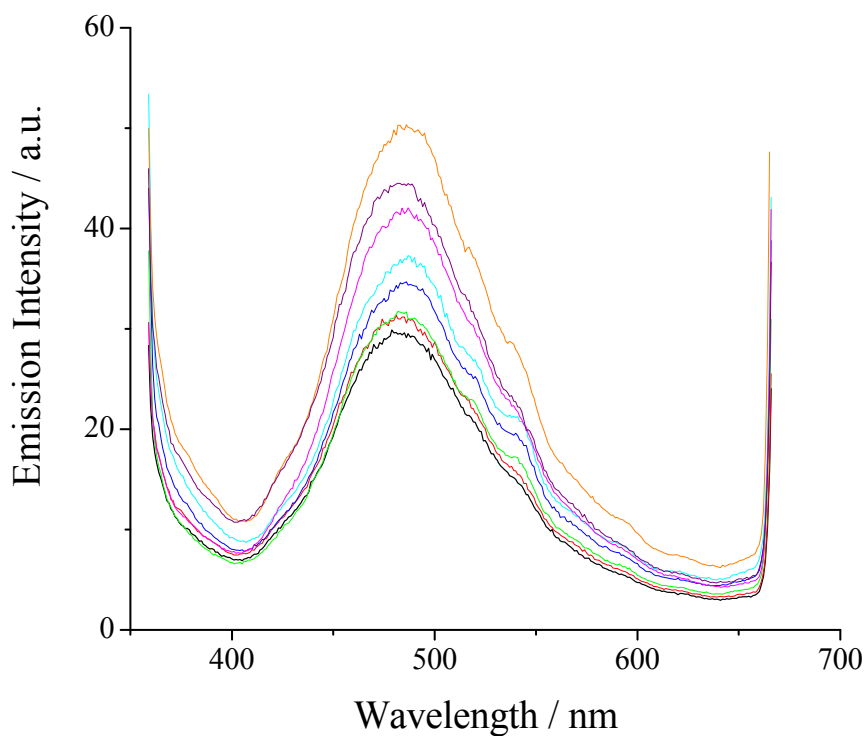

**Figure S17.** Fluorescence spectra of a representative **PyC5-NH<sub>2</sub>-SAM** and upon 10 min immersion in  $\text{CHCl}_3/\text{CH}_3\text{OH}$  (50:50 v:v) **C<sub>12</sub>NH<sub>2</sub>·HCl** solutions. Increasing emission intensities refer to the following increasing **C<sub>12</sub>NH<sub>2</sub>·HCl** concentrations: 0, 10, 20, 50, 70, 100, 150 and 200 ppm;  $\lambda_{\text{exc}} = 343$  nm.
